# Supplementary figures and images for: Structure and energetics of liquid water–hydroxyl layers on Pt(111)
Source: Royal Society of Chemistry journal article supplement (doi:10.1039/d2cp00190j), 2022-01-01

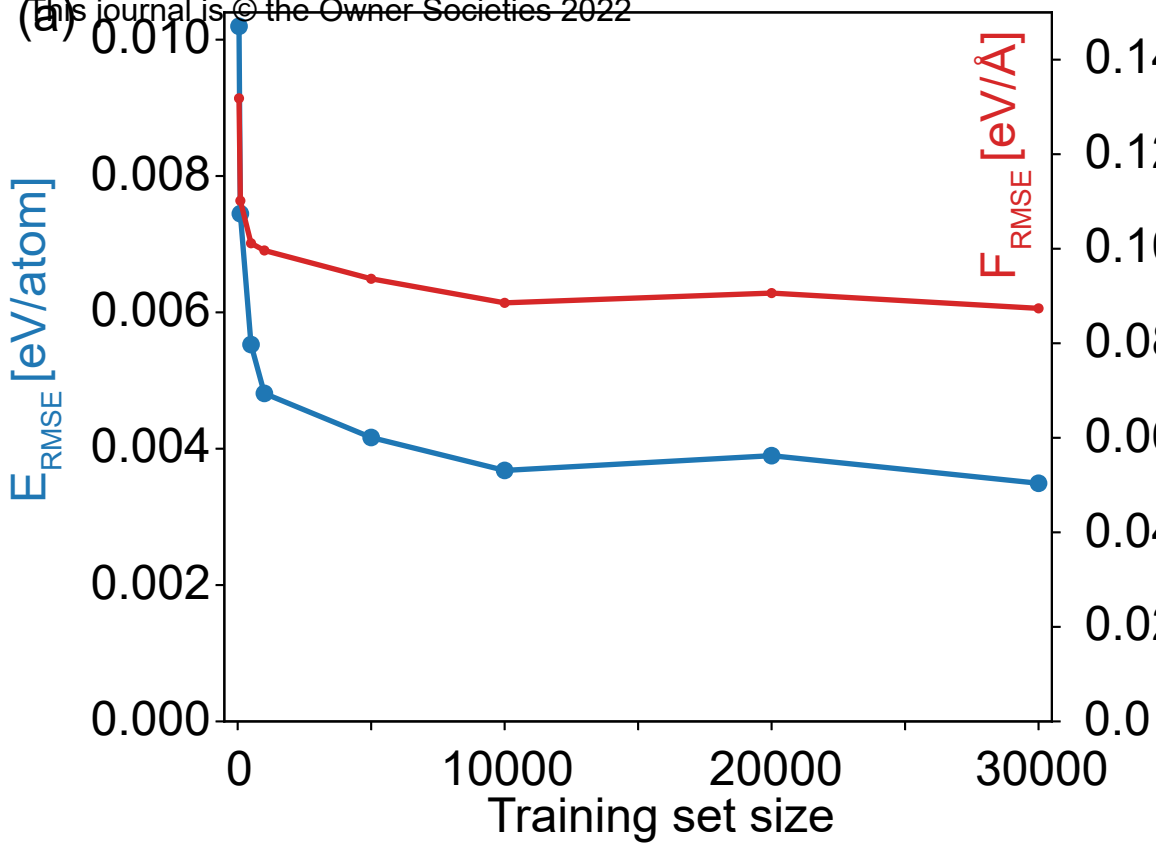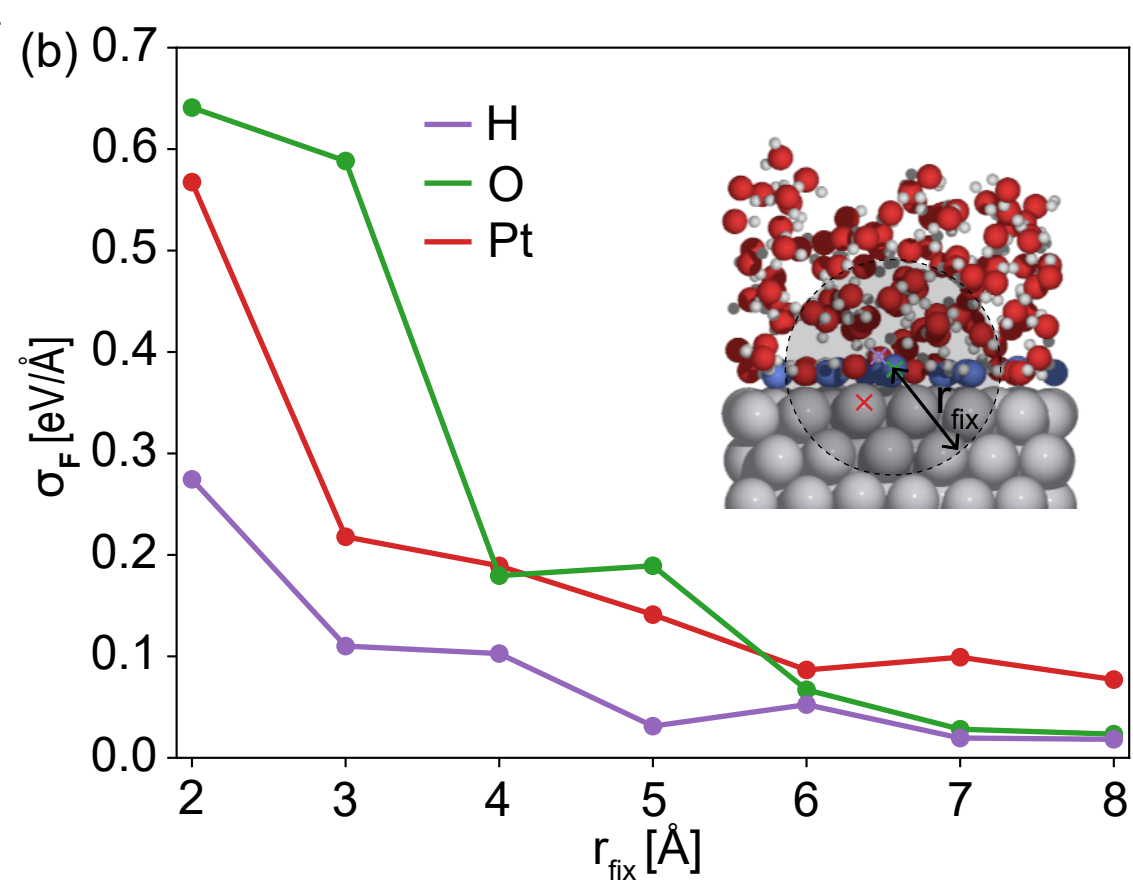

Supplement: d2cp00190j2.pdf [file d2cp00190j2.pdf]
